# Supplementary material for: Clustering of molecular spins in the crystals of nitronylnitroxide and iminonitroxide triradicals based on benzene-1,3,5-triyl frameworks
Source: Royal Society of Chemistry journal article supplement (doi:10.1039/b518416a), 2006-01-01
Supplement: b518416a.pdf [file b518416a.pdf]

Supplementary Data:

Clustering of Molecular Spins in the Crystals of Nitronyl Nitroxide and Iminonitroxide Triradicals  
Based on Benzene-1,3,5-Triyl Frameworks

5

Yuki Kanzaki,<sup>a</sup> Daisuke Shiomi,<sup>\*a,b</sup> Chika Kaneda,<sup>a</sup> Tomoaki Ise,<sup>a,b</sup> Kazunobu Sato,<sup>a</sup> and Takeji  
Takui<sup>\*a</sup>

<sup>a</sup> Departments of Materials Science and Chemistry, Graduate School of Science, Osaka City University,  
10 Sumiyoshi-ku, Osaka 558-8585, Japan, and <sup>b</sup> PRESTO, Japan Science and Technology Agency (JST),  
Honcho Kawaguchi, Saitama 332-0012, Japan

(a)

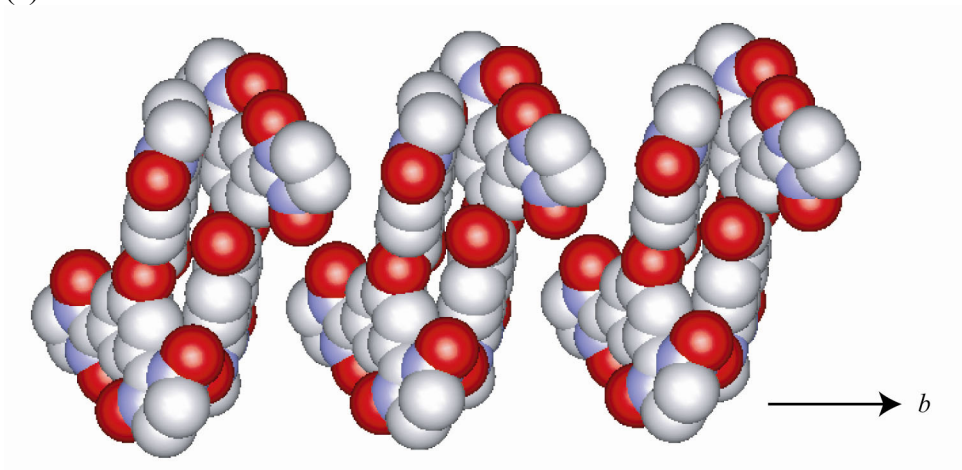

15

(b)

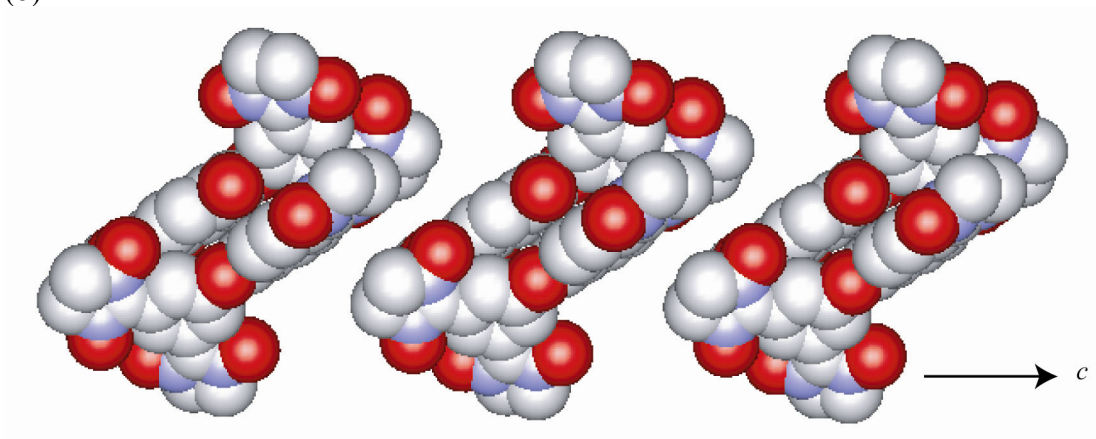

**Fig. 1S** Molecular packing of **trisNN (3)** in the head-to-tail motif along the *b* (a) and *c* axes (b). The methyl groups are omitted for clarity.

(a)

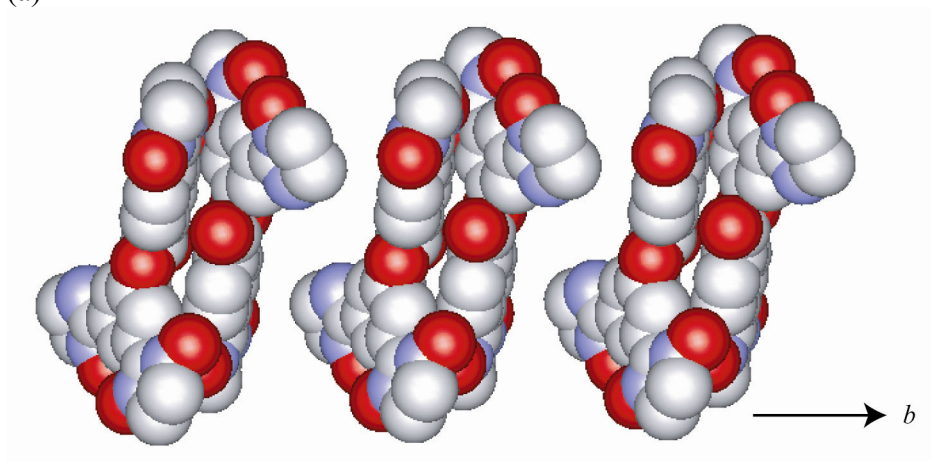

(b)

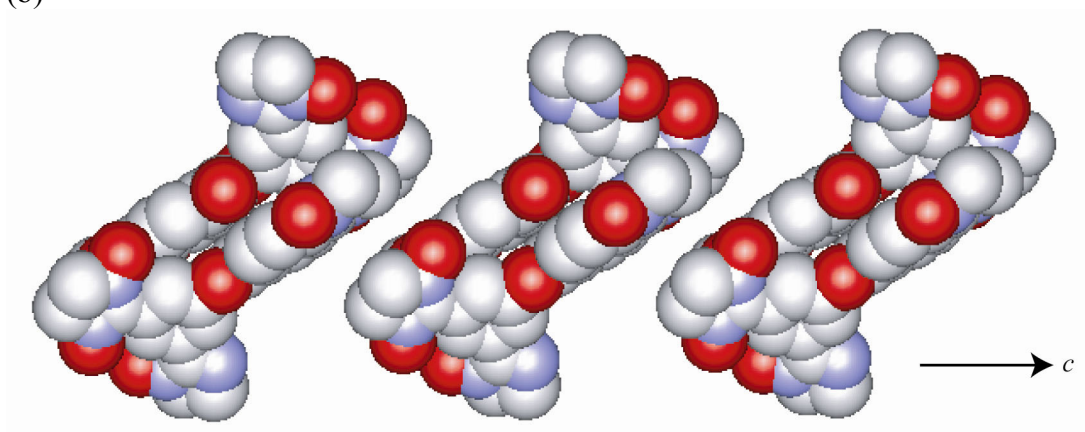

25

**Fig. 2S** Molecular packing of **trisIN (4)** in the head-to-tail motif along the *b* (a) and *c* axes (b). The methyl groups are omitted for clarity.

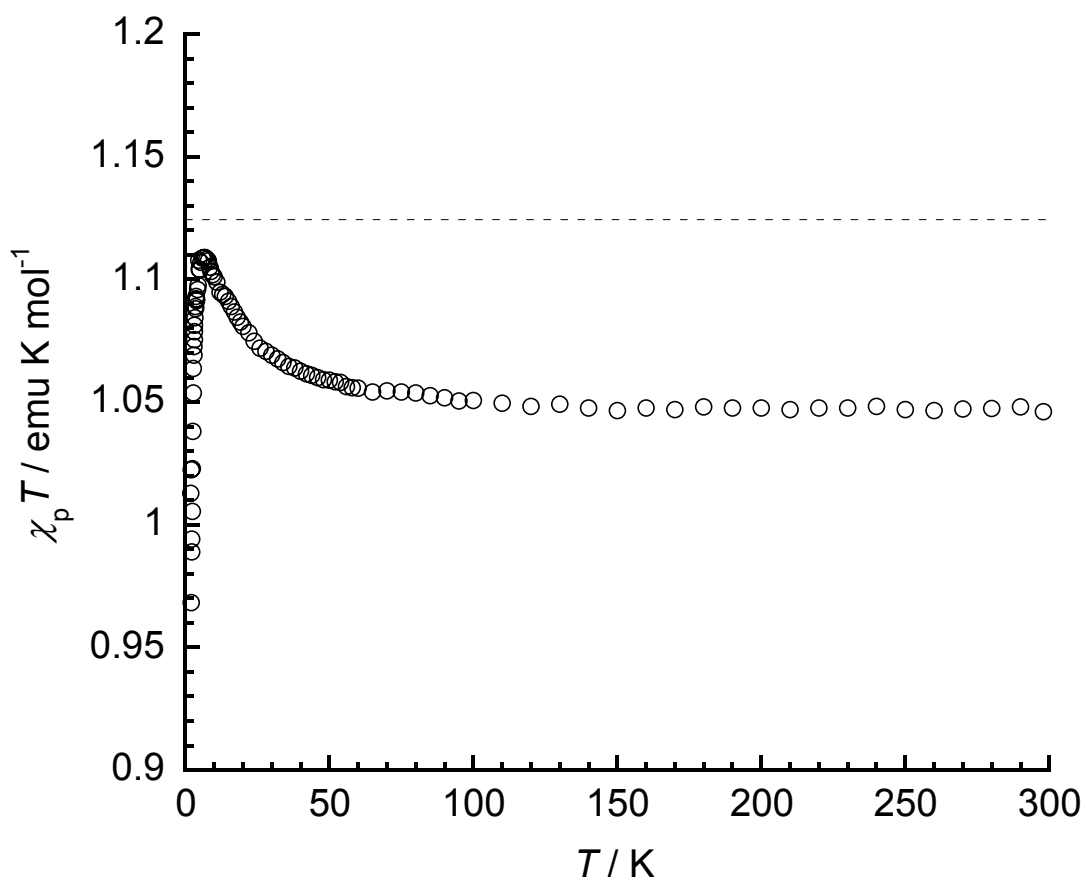

30

**Fig. 3S** Temperature dependence of magnetic susceptibility  $\chi_p$  for **trisIN (4)** diluted in the PVC film in the  $\chi_p T$  vs.  $T$  plots. The horizontal dotted lines show the Curie law for 3 moles of  $S = 1/2$ . The  $\chi_p T$  value of  $1.05 \text{ emu K mol}^{-1}$  at  $298 \text{ K}$  corresponds to the purity of 93% assuming  $g = 2.0$  for the  $g$ -factor. The reduced purity is attributed to decomposition during the preparation of the 35 PVC film by slow evaporation of a  $\text{CH}_2\text{Cl}_2$  solution of **4**.

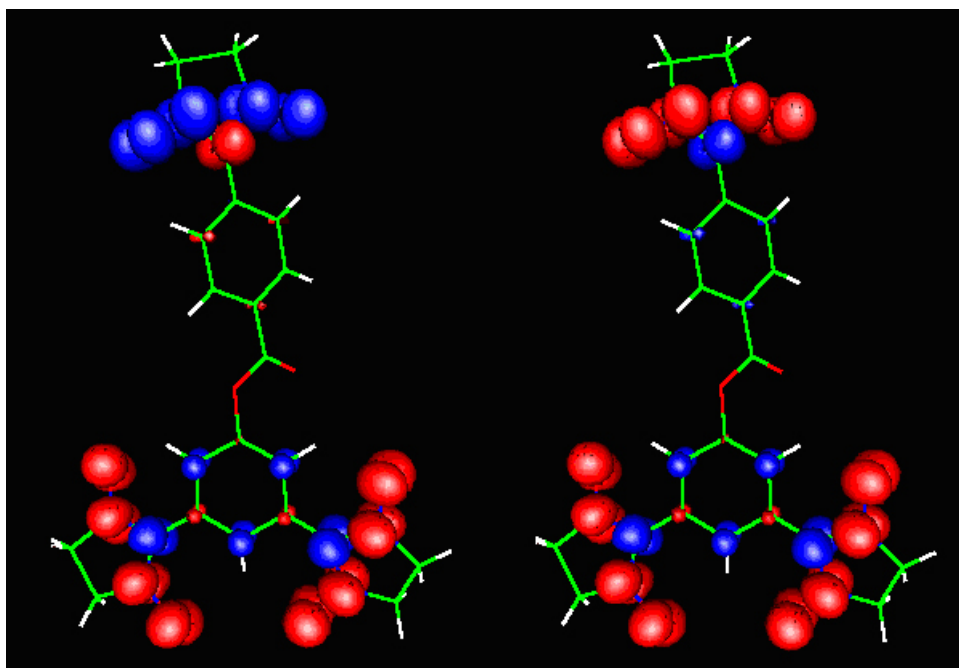

40

**Fig. 4S** Three-dimensional representations of the spin density distribution in **trisNN (3)** for the lowest doublet (left) and the lowest quartet (right) states obtained from the DFT molecular orbital calculations. The red and blue surfaces denote the isocontour values of  $+0.005$  au and  $-0.005$  au, respectively. The methyl groups are replaced by hydrogen atoms in the calculations.

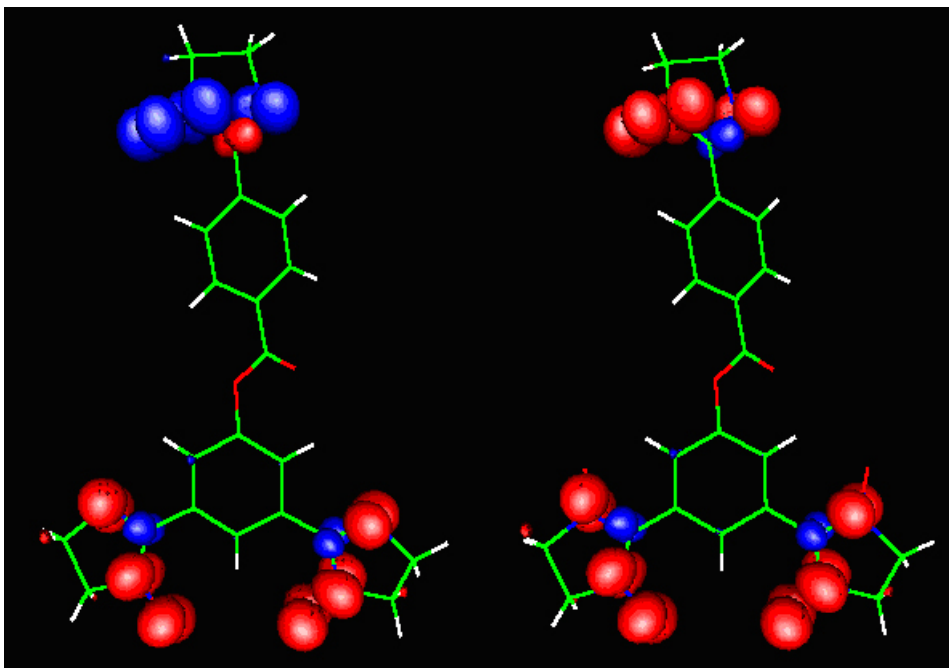

**Fig. 5S** Three-dimensional representations of the spin density distribution in **trisIN (4)** for the lowest doublet (left) and the lowest quartet (right) states obtained from the DFT molecular orbital calculations. The red and blue surfaces denote the isocontour values of  $+0.005$  au and  $-0.005$  au, respectively. The methyl groups are replaced by hydrogen atoms in the calculations.

**Table 1S** Atomic spin densities  $\rho$  of trisNN (**3**) calculated at UB3LYP/6-31+G(d,p) level.<sup>a,b</sup>

| No. | atom    | doublet   | quartet   | No. | atom     | doublet   | quartet   |
|-----|---------|-----------|-----------|-----|----------|-----------|-----------|
| 1   | C1      | 0.060264  | 0.060066  | 29  | H9(C18)  | 0.013032  | 0.013032  |
| 2   | C2      | -0.118126 | -0.118229 | 30  | H10(C19) | 0.004205  | 0.004206  |
| 3   | C3      | 0.082484  | 0.082471  | 31  | H11(C20) | 0.012807  | 0.012808  |
| 4   | C4      | -0.096327 | -0.096804 | 32  | O1       | 0.001262  | -0.001372 |
| 5   | C5      | 0.068765  | 0.068938  | 33  | O6       | 0.007242  | -0.007165 |
| 6   | C6      | -0.091718 | -0.092373 | 34  | C21      | -0.004135 | 0.007662  |
| 7   | H1      | 0.003782  | 0.003800  | 35  | C22      | 0.047345  | -0.043253 |
| 8   | H2      | 0.002898  | 0.002917  | 36  | C23      | -0.032392 | 0.032388  |
| 9   | H3      | 0.003102  | 0.003135  | 37  | C24      | 0.036919  | -0.037066 |
| 10  | O2      | 0.360757  | 0.360768  | 38  | C25      | -0.032828 | 0.033172  |
| 11  | N1      | 0.301442  | 0.301447  | 39  | C26      | 0.052032  | -0.052022 |
| 12  | C7      | -0.221148 | -0.221199 | 40  | C27      | -0.025905 | 0.025911  |
| 13  | N2      | 0.259612  | 0.259624  | 41  | H12      | 0.000933  | -0.000956 |
| 14  | O3      | 0.335420  | 0.335433  | 42  | H13      | -0.001026 | 0.001033  |
| 15  | C8      | -0.013741 | -0.013738 | 43  | H14      | -0.001272 | 0.001276  |
| 16  | C9      | -0.016467 | -0.016468 | 44  | H15      | 0.000963  | -0.000976 |
| 17  | H4(C10) | 0.003610  | 0.003611  | 45  | O7       | -0.352614 | 0.352639  |
| 18  | H5(C11) | 0.014756  | 0.014757  | 46  | N5       | -0.291017 | 0.291040  |
| 19  | H6(C12) | 0.002819  | 0.002819  | 47  | C28      | 0.219463  | -0.219502 |
| 20  | H7(C13) | 0.011074  | 0.011075  | 48  | N6       | -0.279614 | 0.279638  |
| 21  | O4      | 0.354555  | 0.354565  | 49  | O8       | -0.341111 | 0.341143  |
| 22  | N3      | 0.275956  | 0.275968  | 50  | C29      | 0.015899  | -0.015898 |
| 23  | C14     | -0.214357 | -0.214395 | 51  | C30      | 0.015410  | -0.015414 |
| 24  | N4      | 0.281916  | 0.281916  | 52  | H16(C31) | -0.013089 | 0.013090  |
| 25  | O5      | 0.343123  | 0.343166  | 53  | H17(C32) | -0.003884 | 0.003885  |
| 26  | C15     | -0.017242 | -0.017242 | 54  | H18(C33) | -0.003121 | 0.003122  |
| 27  | C16     | -0.014886 | -0.014896 | 55  | H19(C34) | -0.012135 | 0.012136  |
| 28  | H8(C17) | 0.004310  | 0.004310  |     |          |           |           |

<sup>a</sup> The expectation values  $\langle S^2 \rangle$  before and after the spin-projection, *i.e.*, the annihilation of higher spin multiplicity components, are 1.9440 and 1.4941 for the doublet and 3.9443 and 3.7663 for the quartet state, respectively. <sup>b</sup> The atom numbering scheme is 55 given in Scheme 1S.

**Table 2S** Atomic spin densities  $\rho$  of **trisIN (4)** calculated at UB3LYP/6-31+G(d,p) level.<sup>a,b</sup>

| No. | atom     | doublet   | quartet   | No. | atom     | doublet   | quartet   |
|-----|----------|-----------|-----------|-----|----------|-----------|-----------|
| 1   | C1       | 0.026908  | 0.026666  | 29  | H11(C20) | 0.002448  | 0.002449  |
| 2   | C2       | -0.052374 | -0.052103 | 30  | O1       | 0.000718  | -0.000986 |
| 3   | C3       | 0.031486  | 0.031420  | 31  | O5       | 0.003488  | -0.003585 |
| 4   | C4       | -0.029521 | -0.029720 | 32  | C21      | -0.003284 | 0.003178  |
| 5   | C5       | 0.025182  | 0.025293  | 33  | C22      | 0.028575  | -0.027002 |
| 6   | C6       | -0.039359 | -0.039808 | 34  | C23      | -0.023973 | 0.023966  |
| 7   | H1       | 0.001239  | 0.001249  | 35  | C24      | 0.003534  | -0.003622 |
| 8   | H2       | -0.000126 | -0.000117 | 36  | C25      | -0.000232 | 0.000428  |
| 9   | H3       | 0.000977  | 0.001008  | 37  | C26      | 0.029751  | -0.029803 |
| 10  | N1       | 0.410064  | 0.410079  | 38  | C27      | -0.014953 | 0.015236  |
| 11  | C7       | -0.150523 | -0.150549 | 39  | H12      | 0.000933  | -0.000956 |
| 12  | N2       | 0.297873  | 0.297874  | 40  | H13      | -0.001026 | 0.001033  |
| 13  | O3       | 0.448834  | 0.448834  | 41  | H14      | -0.001272 | 0.001276  |
| 14  | C8       | -0.012523 | -0.012521 | 42  | H15      | 0.000963  | -0.000976 |
| 15  | C9       | -0.023480 | -0.023482 | 43  | N5       | -0.373626 | 0.373663  |
| 16  | H4(C10)  | 0.003666  | 0.003667  | 44  | C28      | 0.139914  | -0.139937 |
| 17  | H5(C11)  | 0.018774  | 0.018775  | 45  | N6       | -0.323303 | 0.323305  |
| 18  | H6(C12)  | 0.005569  | 0.005569  | 46  | O7       | -0.461097 | 0.461098  |
| 19  | H7(C13)  | 0.018616  | 0.018616  | 47  | C29      | 0.011503  | -0.011505 |
| 20  | O4       | 0.494624  | 0.494621  | 48  | C30      | 0.025101  | -0.025100 |
| 21  | N3       | 0.332556  | 0.332560  | 49  | H16(C31) | -0.013122 | 0.013124  |
| 22  | C14      | -0.119475 | -0.119496 | 50  | H17(C32) | -0.002841 | 0.002842  |
| 23  | N4       | 0.300585  | 0.300612  | 51  | H18(C33) | -0.006392 | 0.006392  |
| 24  | C15      | -0.028139 | -0.028141 | 52  | H19(C34) | -0.019767 | 0.019767  |
| 25  | C16      | -0.006501 | -0.006503 |     |          |           |           |
| 26  | H8(C17)  | 0.008081  | 0.008081  |     |          |           |           |
| 27  | H9(C18)  | 0.023064  | 0.023064  |     |          |           |           |
| 28  | H10(C19) | 0.011018  | 0.011019  |     |          |           |           |

<sup>a</sup> The expectation values  $\langle S^2 \rangle$  before and after the spin-projection, *i.e.*, the annihilation of higher spin multiplicity components, are 1.8212 and 1.0017 for the doublet and 3.8212 and 3.7522 for the quartet state, respectively. <sup>b</sup> The atom numbering scheme is given in Scheme 1S.



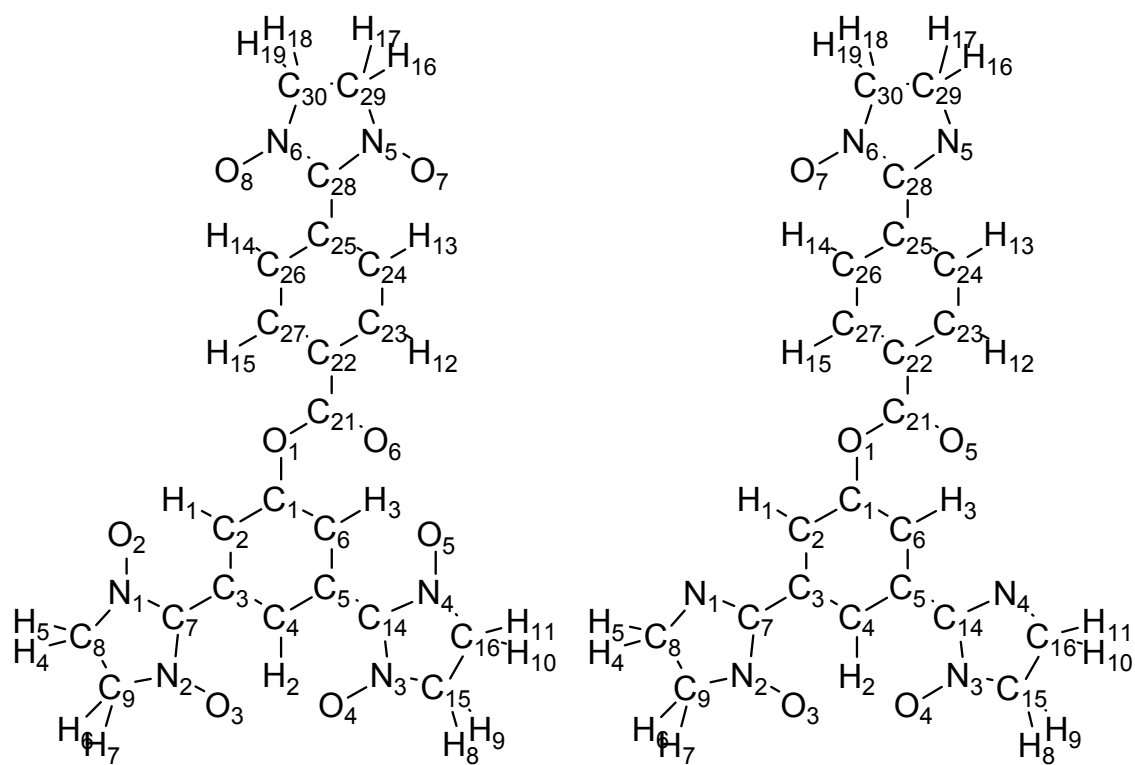

**Scheme 1S** Atom numbering schemes of **trisNN** (**3**) (left) and **trisIN** (**4**) (right), corresponding to the DFT-calculated spin density distribution in Table 1S and Table 2S.
